# Supplementary material for: Palladium nanostructures synthesized by radiolysis or by photoreduction
Source: Royal Society of Chemistry journal article supplement (doi:10.1039/b719517f), 2008-01-01
Supplement: b719517f.pdf [file b719517f.pdf]

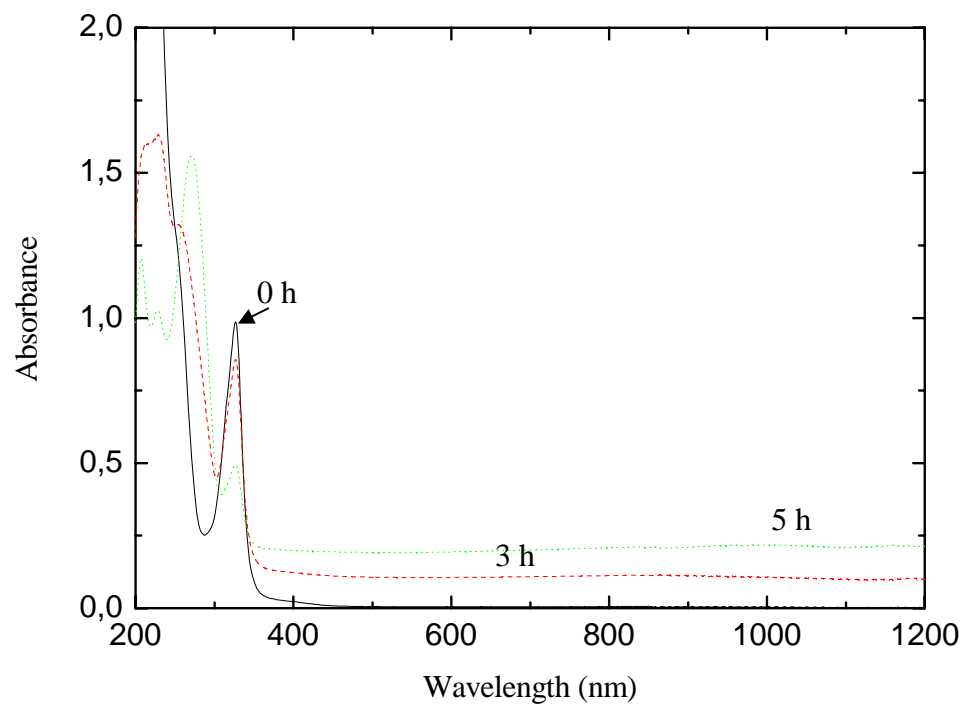

**Figure S1:** Absorption spectrum evolution with UV irradiation of a solution containing  $10^{-3} \text{ mol L}^{-1} \text{ Pd(acac)}_2$  in 2-propanol under 1 atm of CO. Optical path = 1 mm.
